# Supplementary material for: Microbacterium Cluster EA Bacteriophages: Phylogenomic Relationships and Host Range Predictions
Source: MDPI journal article supplement (doi:10.3390/microorganisms11010170), 2023-01-10
Supplement: s1 [file s1]

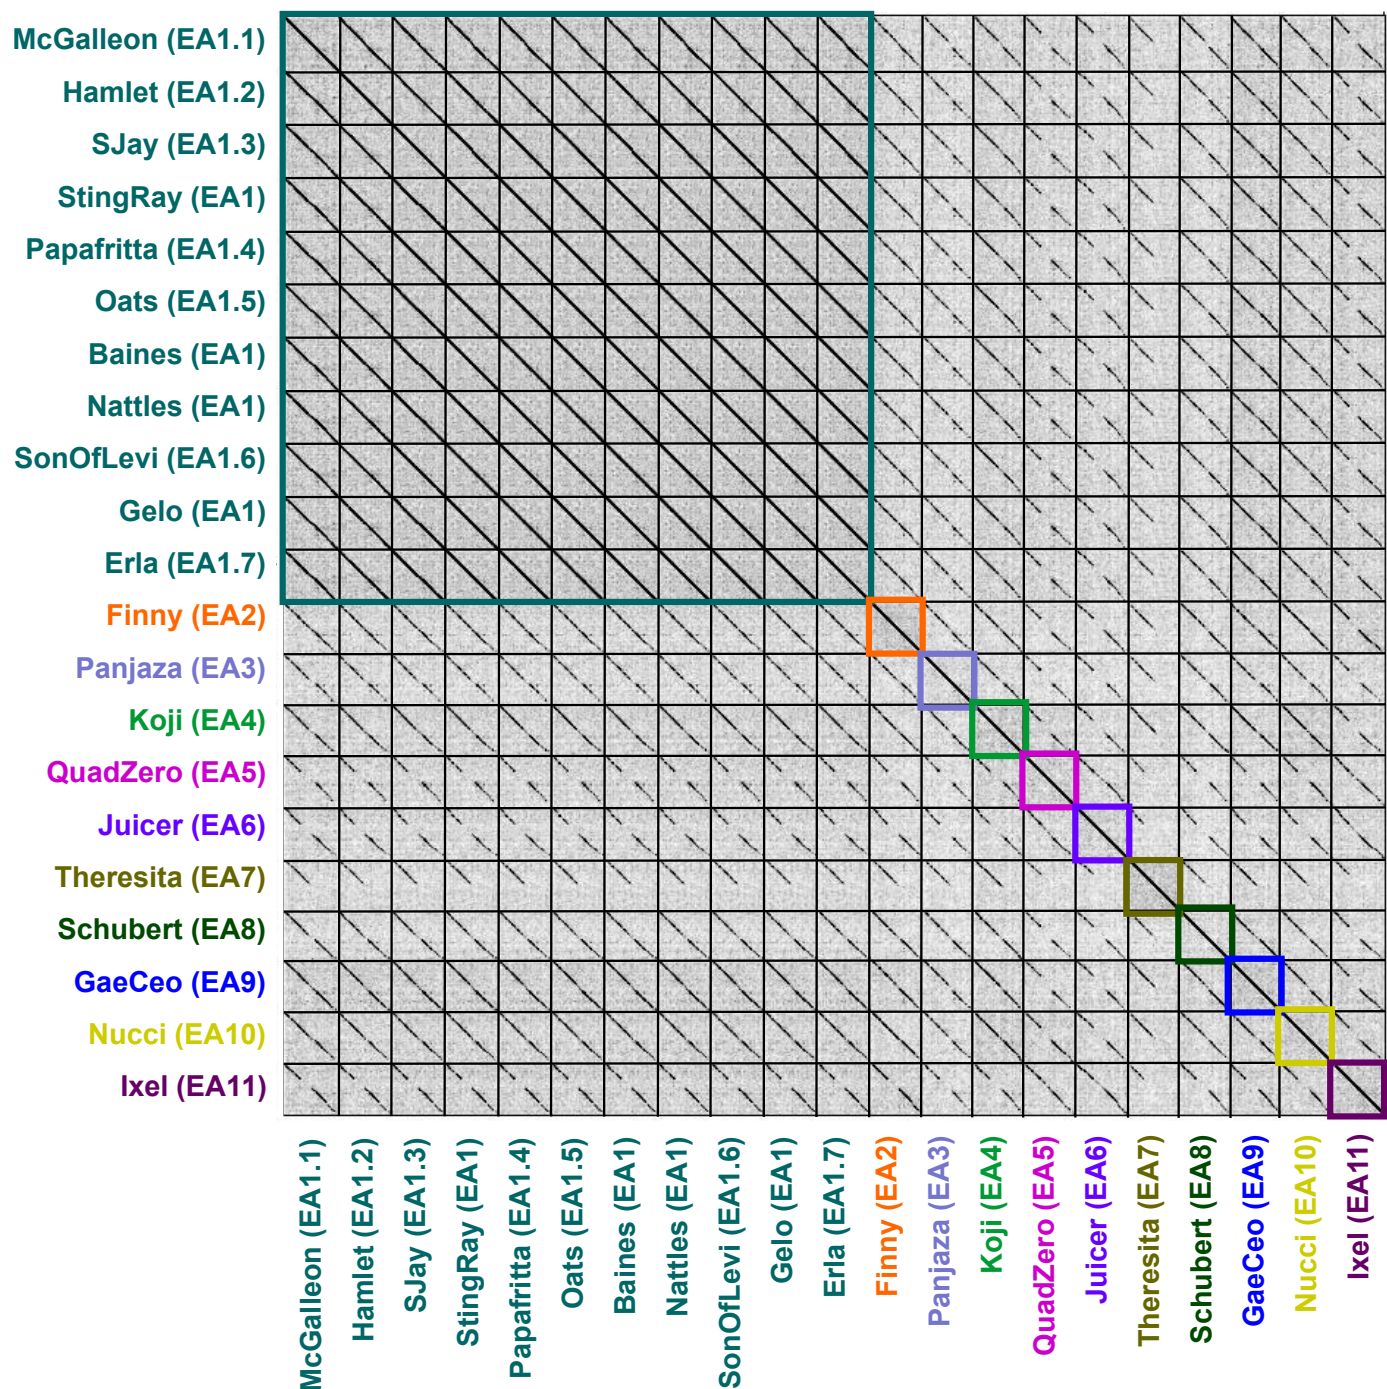

**Supplementary Figure S1.** Dot plots of representative cluster EA bacteriophages from each of the groupings shown in the neighbor-joining tree (Figure 1). Sub-clusters (EA1 to EA11) are indicated by colors. Additional details on these bacteriophage genomes can be found in Supplementary Table S1.

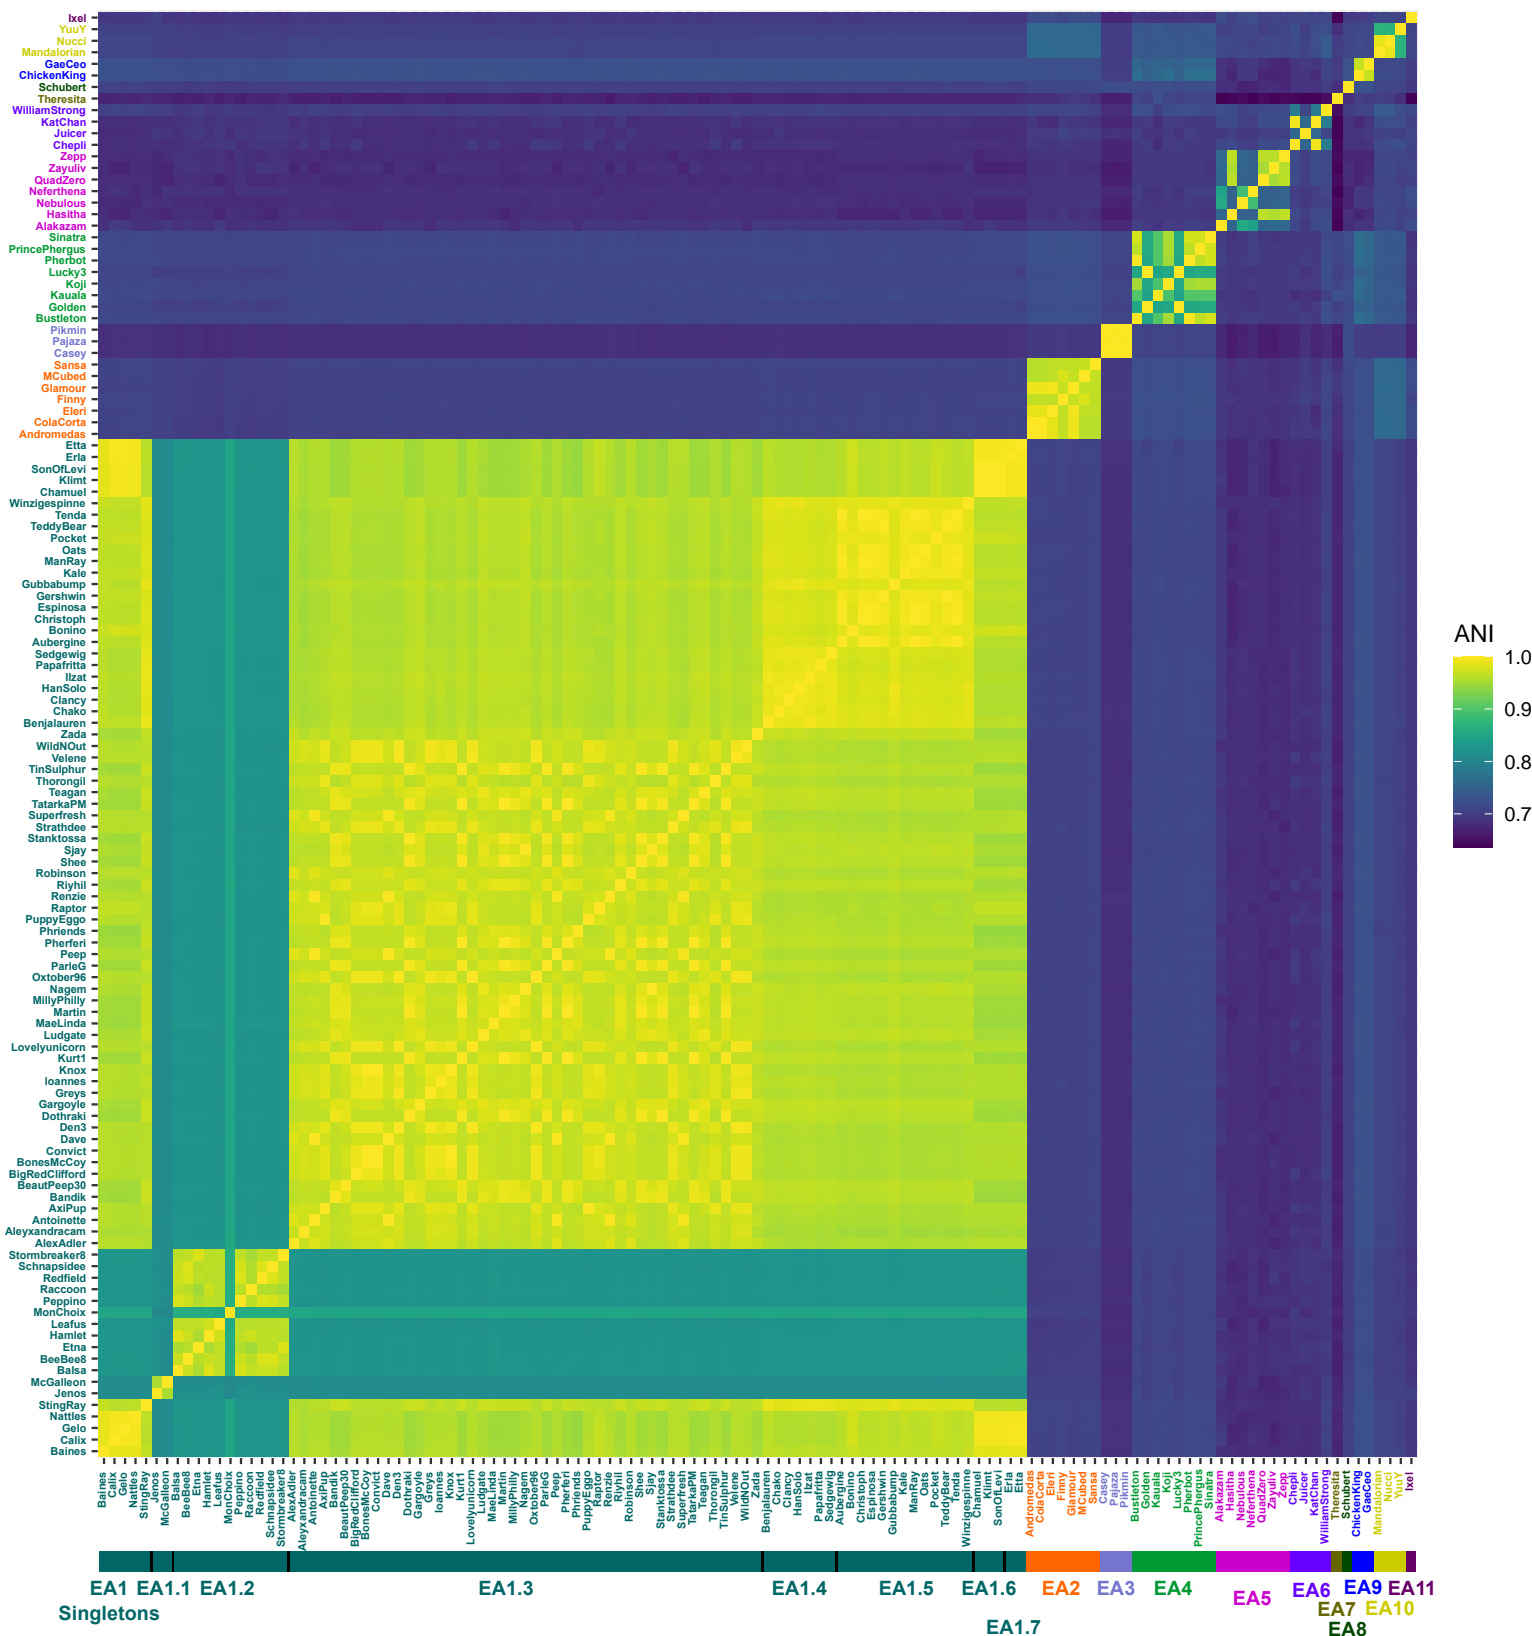

**Supplementary Figure S2.** Average nucleotide identities (ANIs) of closely-related cluster EA bacteriophages from each of the groupings shown in the neighbor-joining tree (Figure 1), with sub-clusters (EA1 to EA11) indicated by colors. Additional details on these bacteriophage genomes can be found in Supplementary Table S1.
