# Supplementary material for: Microbacterium Cluster EA Bacteriophages: Phylogenomic Relationships and Host Range Predictions
Source: MDPI journal article supplement (doi:10.3390/microorganisms11010170), 2023-01-10
Supplement: s1 [file s1]

**Supplementary Table S1. *Microbacterium* cluster EA bacteriophages included in the comparative analyses.**

| phage          | sub-cluster | host                               | NJ-tree group <sup>1</sup> | length (in bp) | GC-content | # ORFs | # tRNAs | accession # | reference                      |
|----------------|-------------|------------------------------------|----------------------------|----------------|------------|--------|---------|-------------|--------------------------------|
| AlexAdler      | EA1         | <i>M. foliorum</i><br>NRRL B-24224 | 3                          | 41,834         | 63.4%      | 63     | 0       | MG962360    | Jacobs-Sera <i>et al.</i> 2020 |
| Alyxandracam   | EA1         | <i>M. foliorum</i><br>NRRL B-24224 | 3                          | 41,770         | 63.4%      | 63     | 0       | MN062713    | unpublished                    |
| Antoinette     | EA1         | <i>M. foliorum</i><br>NRRL B-24224 | 3                          | 41,858         | 63.4%      | 63     | 0       | MH045565    | Jacobs-Sera <i>et al.</i> 2020 |
| Aubergine      | EA1         | <i>M. foliorum</i><br>NRRL B-24224 | 5                          | 41,555         | 63.4%      | 62     | 0       | MG839015    | Jacobs-Sera <i>et al.</i> 2020 |
| AxiPup         | EA1         | <i>M. foliorum</i><br>NRRL B-24224 | 3                          | 41,770         | 63.3%      | 63     | 0       | MG839016    | Jacobs-Sera <i>et al.</i> 2020 |
| Baines         | EA1         | <i>M. foliorum</i><br>NRRL B-24224 | single                     | 41,555         | 63.4%      | 62     | 0       | MG839017    | Jacobs-Sera <i>et al.</i> 2020 |
| Balsa          | EA1         | <i>M. foliorum</i><br>NRRL B-24224 | 2                          | 41,862         | 63.4%      | 62     | 0       | MG839030    | Jacobs-Sera <i>et al.</i> 2020 |
| Bandik         | EA1         | <i>M. foliorum</i><br>NRRL B-24224 | 3                          | 41,804         | 63.5%      | 63     | 0       | MH045554    | Jacobs-Sera <i>et al.</i> 2020 |
| BeautPeep30    | EA1         | <i>M. foliorum</i><br>NRRL B-24224 | 3                          | 41,809         | 63.5%      | 63     | 0       | MT310861    | unpublished                    |
| BeeBee8        | EA1         | <i>M. foliorum</i><br>NRRL B-24224 | 2                          | 42,027         | 63.3%      | 65     | 0       | MH045555    | Jacobs-Sera <i>et al.</i> 2020 |
| Benjalauren    | EA1         | <i>M. foliorum</i><br>NRRL B-24224 | 4                          | 41,561         | 63.5%      | 63     | 0       | MN369737    | unpublished                    |
| BigRedClifford | EA1         | <i>M. foliorum</i><br>NRRL B-24224 | 3                          | 41,797         | 63.3%      | 63     | 0       | MT498049    | unpublished                    |
| BonesMcCoy     | EA1         | <i>M. foliorum</i><br>NRRL B-24224 | 3                          | 41,797         | 63.4%      | 63     | 0       | MK967391    | unpublished                    |
| Bonino         | EA1         | <i>M. foliorum</i><br>NRRL B-24224 | 5                          | 41,534         | 63.4%      | 62     | 0       | MG920061    | Jacobs-Sera <i>et al.</i> 2020 |
| Calix          | EA1         | <i>M. foliorum</i><br>NRRL B-24224 | single                     | 41,555         | 63.4%      | 62     | 0       | MN234163    | unpublished                    |
| Chako          | EA1         | <i>M. foliorum</i><br>NRRL B-24224 | 4                          | 41,550         | 63.4%      | 62     | 0       | OP867023    | Milhaven <i>et al.</i>         |
| Chamuel        | EA1         | <i>M. foliorum</i><br>NRRL B-24224 | 6                          | 41,568         | 63.3%      | 62     | 0       | MN807246    | unpublished                    |
| Christoph      | EA1         | <i>M. foliorum</i><br>NRRL B-24224 | 5                          | 41,554         | 63.4%      | 62     | 0       | MN234222    | unpublished                    |
| Clancy         | EA1         | <i>M. foliorum</i><br>NRRL B-24224 | 4                          | 41,555         | 63.4%      | 62     | 0       | MK967400    | unpublished                    |
| Convict        | EA1         | <i>M. foliorum</i><br>NRRL B-24224 | 3                          | 41,798         | 63.4%      | 63     | 0       | MT310873    | unpublished                    |

|           |     |                                    |        |        |       |    |   |          |                                |
|-----------|-----|------------------------------------|--------|--------|-------|----|---|----------|--------------------------------|
| Dave      | EA1 | <i>M. foliorum</i><br>NRRL B-24224 | 3      | 41,858 | 63.4% | 63 | 0 | MH045558 | Jacobs-Sera <i>et al.</i> 2020 |
| Den3      | EA1 | <i>M. foliorum</i><br>NRRL B-24224 | 3      | 41,800 | 63.4% | 63 | 0 | MN062702 | unpublished                    |
| Dothraki  | EA1 | <i>M. foliorum</i><br>NRRL B-24224 | 3      | 41,809 | 63.6% | 63 | 0 | MT451985 | unpublished                    |
| Erla      | EA1 | <i>M. foliorum</i><br>NRRL B-24224 | 7      | 41,538 | 63.4% | 62 | 0 | MW291026 | Milhaven <i>et al.</i> 2021    |
| Espinosa  | EA1 | <i>M. foliorum</i><br>NRRL B-24224 | 5      | 41,553 | 63.4% | 62 | 0 | MG839018 | Jacobs-Sera <i>et al.</i> 2020 |
| Etna      | EA1 | <i>M. foliorum</i><br>NRRL B-24224 | 2      | 41,908 | 63.4% | 64 | 0 | MH045559 | Jacobs-Sera <i>et al.</i> 2020 |
| Etta      | EA1 | <i>M. foliorum</i><br>NRRL B-24224 | 7      | 41,542 | 63.3% | 62 | 0 | MK977697 | unpublished                    |
| Gargoyle  | EA1 | <i>M. foliorum</i><br>NRRL B-24224 | 3      | 41,803 | 63.5% | 63 | 0 | MH153802 | Jacobs-Sera <i>et al.</i> 2020 |
| Gelo      | EA1 | <i>M. foliorum</i><br>NRRL B-24224 | single | 41,562 | 63.4% | 62 | 0 | MG962367 | Jacobs-Sera <i>et al.</i> 2020 |
| Gershwin  | EA1 | <i>M. foliorum</i><br>NRRL B-24224 | 5      | 41,555 | 63.4% | 62 | 0 | MN234177 | unpublished                    |
| Greys     | EA1 | <i>M. foliorum</i><br>NRRL B-24224 | 3      | 41,797 | 63.4% | 63 | 0 | MK757447 | unpublished                    |
| Gubbabump | EA1 | <i>M. foliorum</i><br>NRRL B-24224 | 5      | 41,492 | 63.4% | 62 | 0 | MT986026 | unpublished                    |
| Hamlet    | EA1 | <i>M. foliorum</i><br>NRRL B-24224 | 2      | 41,934 | 63.4% | 63 | 0 | MG839019 | Jacobs-Sera <i>et al.</i> 2020 |
| HanSolo   | EA1 | <i>M. foliorum</i><br>NRRL B-24224 | 4      | 41,516 | 63.4% | 62 | 0 | MK967394 | unpublished                    |
| Ilzat     | EA1 | <i>M. foliorum</i><br>NRRL B-24224 | 4      | 41,525 | 63.5% | 62 | 0 | MG839029 | Jacobs-Sera <i>et al.</i> 2020 |
| Ioannes   | EA1 | <i>M. foliorum</i><br>NRRL B-24224 | 3      | 41,879 | 63.4% | 63 | 0 | MN735430 | El Yaman <i>et al.</i> 2020    |
| Jenos     | EA1 | <i>M. foliorum</i><br>NRRL B-24224 | 1      | 42,413 | 63.8% | 64 | 0 | MZ005681 | unpublished                    |
| Kale      | EA1 | <i>M. foliorum</i><br>NRRL B-24224 | 5      | 41,558 | 63.4% | 62 | 0 | MG839020 | Jacobs-Sera <i>et al.</i> 2020 |
| Klimt     | EA1 | <i>M. foliorum</i><br>NRRL B-24224 | 6      | 41,573 | 63.4% | 65 | 0 | MN617840 | unpublished                    |
| Knox      | EA1 | <i>M. foliorum</i><br>NRRL B-24224 | 3      | 41,797 | 63.3% | 63 | 0 | MG839021 | Jacobs-Sera <i>et al.</i> 2020 |
| Kurt1     | EA1 | <i>M. foliorum</i><br>NRRL B-24224 | 3      | 41,803 | 63.6% | 63 | 0 | MT553341 | unpublished                    |

|               |     |                                     |        |        |       |    |   |          |                                 |
|---------------|-----|-------------------------------------|--------|--------|-------|----|---|----------|---------------------------------|
| Leafus        | EA1 | <i>M. liquefaciens</i><br>LMG 16120 | 2      | 42,000 | 63.4% | 63 | 0 | MT498062 | Frost <i>et al.</i> 2021        |
| Lovelyunicorn | EA1 | <i>M. foliorum</i><br>NRRL B-24224  | 3      | 41,798 | 63.4% | 63 | 0 | MT553339 | unpublished                     |
| Ludgate       | EA1 | <i>M. foliorum</i><br>NRRL B-24224  | 3      | 41,799 | 63.5% | 63 | 0 | MG839022 | Jacobs-Sera <i>et al.</i> 2020  |
| MaeLinda      | EA1 | <i>M. foliorum</i><br>NRRL B-24224  | 3      | 41,809 | 63.6% | 63 | 0 | MT952846 | unpublished                     |
| ManRay        | EA1 | <i>M. foliorum</i><br>NRRL B-24224  | 5      | 41,555 | 63.4% | 62 | 0 | MN234204 | unpublished                     |
| Martin        | EA1 | <i>M. foliorum</i><br>NRRL B-24224  | 3      | 41,812 | 63.5% | 64 | 0 | MH153805 | Jacobs-Sera <i>et al.</i> 2020  |
| McGalleon     | EA1 | <i>M. foliorum</i><br>NRRL B-24224  | 1      | 42,562 | 63.7% | 63 | 0 | MN062703 | unpublished                     |
| MillyPhilly   | EA1 | <i>M. foliorum</i><br>NRRL B-24224  | 3      | 41,800 | 63.5% | 63 | 0 | MK620903 | Nguyen Quach <i>et al.</i> 2019 |
| MonChoix      | EA1 | <i>M. foliorum</i><br>NRRL B-24224  | 2      | 41,670 | 63.4% | 63 | 0 | MK894437 | unpublished                     |
| Nagem         | EA1 | <i>M. foliorum</i><br>NRRL B-24224  | 3      | 41,846 | 63.5% | 63 | 0 | MH045560 | Jacobs-Sera <i>et al.</i> 2020  |
| Nattles       | EA1 | <i>M. foliorum</i><br>NRRL B-24224  | single | 41,544 | 63.4% | 62 | 0 | MG925352 | Jacobs-Sera <i>et al.</i> 2020  |
| Oats          | EA1 | <i>M. foliorum</i><br>NRRL B-24224  | 5      | 41,555 | 63.4% | 62 | 0 | MH153806 | Jacobs-Sera <i>et al.</i> 2020  |
| Oxtober96     | EA1 | <i>M. foliorum</i><br>NRRL B-24224  | 3      | 41,798 | 63.4% | 64 | 0 | MT024864 | unpublished                     |
| Papafritta    | EA1 | <i>M. foliorum</i><br>NRRL B-24224  | 4      | 41,573 | 63.4% | 62 | 0 | MH513981 | Jacobs-Sera <i>et al.</i> 2020  |
| ParleG        | EA1 | <i>M. foliorum</i><br>NRRL B-24224  | 3      | 41,810 | 63.6% | 63 | 0 | MT553343 | unpublished                     |
| Peep          | EA1 | <i>M. foliorum</i><br>NRRL B-24224  | 3      | 41,856 | 63.4% | 63 | 0 | MG839023 | Jacobs-Sera <i>et al.</i> 2020  |
| Peppino       | EA1 | <i>M. foliorum</i><br>NRRL B-24224  | 2      | 41,932 | 63.3% | 63 | 0 | MG839024 | Jacobs-Sera <i>et al.</i> 2020  |
| Pherferi      | EA1 | <i>M. foliorum</i><br>NRRL B-24224  | 3      | 41,803 | 63.6% | 62 | 0 | MT310866 | unpublished                     |
| Phriends      | EA1 | <i>M. foliorum</i><br>NRRL B-24224  | 3      | 41,606 | 63.6% | 62 | 0 | MK620902 | Nguyen Quach <i>et al.</i> 2019 |
| Pocket        | EA1 | <i>M. foliorum</i><br>NRRL B-24224  | 5      | 41,583 | 63.4% | 62 | 0 | MN234181 | unpublished                     |
| PuppyEggo     | EA1 | <i>M. foliorum</i><br>NRRL B-24224  | 3      | 41,803 | 63.3% | 63 | 0 | MG944219 | Jacobs-Sera <i>et al.</i> 2020  |

|               |     |                                    |        |        |       |    |   |          |                                 |
|---------------|-----|------------------------------------|--------|--------|-------|----|---|----------|---------------------------------|
| Raccoon       | EA1 | <i>M. foliorum</i><br>NRRL B-24224 | 2      | 41,894 | 63.4% | 63 | 0 | MG839025 | Jacobs-Sera <i>et al.</i> 2020  |
| Raptor        | EA1 | <i>M. foliorum</i><br>NRRL B-24224 | 3      | 41,801 | 63.4% | 63 | 0 | MH045562 | Jacobs-Sera <i>et al.</i> 2020  |
| Redfield      | EA1 | <i>M. foliorum</i><br>NRRL B-24224 | 2      | 41,930 | 63.3% | 63 | 0 | MH479922 | Jacobs-Sera <i>et al.</i> 2020  |
| Renzie        | EA1 | <i>M. foliorum</i><br>NRRL B-24224 | 3      | 41,872 | 63.4% | 63 | 0 | MN735435 | unpublished                     |
| Riyhil        | EA1 | <i>M. foliorum</i><br>NRRL B-24224 | 3      | 41,812 | 63.5% | 63 | 0 | MK620895 | Nguyen Quach <i>et al.</i> 2019 |
| Robinson      | EA1 | <i>M. foliorum</i><br>NRRL B-24224 | 3      | 41,874 | 63.5% | 63 | 0 | MH045563 | Jacobs-Sera <i>et al.</i> 2020  |
| Schnapsidee   | EA1 | <i>M. foliorum</i><br>NRRL B-24224 | 2      | 41,872 | 63.4% | 63 | 0 | MH590590 | Jacobs-Sera <i>et al.</i> 2020  |
| Sedgewig      | EA1 | <i>M. foliorum</i><br>NRRL B-24224 | 4      | 41,505 | 63.4% | 62 | 0 | MT310851 | unpublished                     |
| Shee          | EA1 | <i>M. foliorum</i><br>NRRL B-24224 | 3      | 41,800 | 63.5% | 63 | 0 | MK919471 | unpublished                     |
| SJay          | EA1 | <i>M. foliorum</i><br>NRRL B-24224 | 3      | 41,847 | 63.5% | 63 | 0 | MZ958749 | unpublished                     |
| SonOfLevi     | EA1 | <i>M. foliorum</i><br>NRRL B-24224 | 6      | 41,573 | 63.4% | 64 | 0 | MN892483 | unpublished                     |
| Stanktossa    | EA1 | <i>M. foliorum</i><br>NRRL B-24224 | 3      | 41,806 | 63.6% | 62 | 0 | MN062709 | unpublished                     |
| StingRay      | EA1 | <i>M. foliorum</i><br>NRRL B-24224 | single | 41,597 | 63.5% | 62 | 0 | MG944222 | Jacobs-Sera <i>et al.</i> 2020  |
| Stormbreaker8 | EA1 | <i>M. foliorum</i><br>NRRL B-24224 | 2      | 41,751 | 63.4% | 62 | 0 | MZ171379 | unpublished                     |
| Strathdee     | EA1 | <i>M. foliorum</i><br>NRRL B-24224 | 3      | 41,802 | 63.4% | 63 | 0 | MZ005684 | unpublished                     |
| Superfresh    | EA1 | <i>M. foliorum</i><br>NRRL B-24224 | 3      | 41,860 | 63.4% | 63 | 0 | MG839026 | Jacobs-Sera <i>et al.</i> 2020  |
| TatarkaPM     | EA1 | <i>M. foliorum</i><br>NRRL B-24224 | 3      | 41,813 | 63.5% | 63 | 0 | MT771350 | unpublished                     |
| Teagan        | EA1 | <i>M. foliorum</i><br>NRRL B-24224 | 3      | 41,793 | 63.5% | 63 | 0 | MH153811 | Jacobs-Sera <i>et al.</i> 2020  |
| TeddyBear     | EA1 | <i>M. foliorum</i><br>NRRL B-24224 | 5      | 41,555 | 63.4% | 63 | 0 | MH045564 | Jacobs-Sera <i>et al.</i> 2020  |
| Tenda         | EA1 | <i>M. foliorum</i><br>NRRL B-24224 | 5      | 41,553 | 63.4% | 62 | 0 | MG839028 | Jacobs-Sera <i>et al.</i> 2020  |
| Thorongil     | EA1 | <i>M. foliorum</i><br>NRRL B-24224 | 3      | 41,331 | 63.3% | 63 | 0 | MW055911 | unpublished                     |

|               |     |                                    |   |        |       |    |   |          |                                 |
|---------------|-----|------------------------------------|---|--------|-------|----|---|----------|---------------------------------|
| TinSulphur    | EA1 | <i>M. foliorum</i><br>NRRL B-24224 | 3 | 41,807 | 63.5% | 64 | 0 | MK620905 | Nguyen Quach <i>et al.</i> 2019 |
| Velene        | EA1 | <i>M. foliorum</i><br>NRRL B-24224 | 3 | 41,798 | 63.4% | 63 | 0 | MK967388 | unpublished                     |
| WildNOut      | EA1 | <i>M. foliorum</i><br>NRRL B-24224 | 3 | 41,796 | 63.4% | 63 | 0 | MW435859 | unpublished                     |
| Winzigespinne | EA1 | <i>M. foliorum</i><br>NRRL B-24224 | 5 | 41,556 | 63.4% | 62 | 0 | MT986027 | unpublished                     |
| Zada          | EA1 | <i>M. foliorum</i><br>NRRL B-24224 | 3 | 41,814 | 63.5% | 64 | 0 | MT310856 | El Yaman <i>et al.</i> 2020     |
| Andromedas    | EA2 | <i>M. foliorum</i><br>NRRL B-24224 |   | 40,494 | 62.0% | 63 | 0 | MH590606 | Jacobs-Sera <i>et al.</i> 2020  |
| ColaCorta     | EA2 | <i>M. foliorum</i><br>NRRL B-24224 |   | 40,494 | 62.0% | 63 | 0 | MH590604 | Jacobs-Sera <i>et al.</i> 2020  |
| Eleri         | EA2 | <i>M. foliorum</i><br>NRRL B-24224 |   | 40,366 | 62.0% | 63 | 0 | MG839027 | Jacobs-Sera <i>et al.</i> 2020  |
| Finny         | EA2 | <i>M. foliorum</i><br>NRRL B-24224 |   | 40,313 | 62.1% | 59 | 0 | MK894432 | Lee <i>et al.</i> 2019          |
| Glamour       | EA2 | <i>M. foliorum</i><br>NRRL B-24224 |   | 40,224 | 62.1% | 62 | 0 | MT553340 | unpublished                     |
| MCubed        | EA2 | <i>M. foliorum</i><br>NRRL B-24224 |   | 40,381 | 62.0% | 62 | 0 | MN096378 | unpublished                     |
| Sansa         | EA2 | <i>M. foliorum</i><br>NRRL B-24224 |   | 40,306 | 61.8% | 62 | 0 | MH513982 | Jacobs-Sera <i>et al.</i> 2020  |
| Casey         | EA3 | <i>M. foliorum</i><br>NRRL B-24224 |   | 39,307 | 61.3% | 59 | 0 | MG944226 | Jacobs-Sera <i>et al.</i> 2020  |
| Pajaza        | EA3 | <i>M. foliorum</i><br>NRRL B-24224 |   | 39,307 | 61.2% | 59 | 0 | MG944216 | Jacobs-Sera <i>et al.</i> 2020  |
| Pikmin        | EA3 | <i>M. foliorum</i><br>NRRL B-24224 |   | 39,307 | 61.3% | 59 | 0 | MG944218 | Jacobs-Sera <i>et al.</i> 2020  |
| Bustleton     | EA4 | <i>M. foliorum</i><br>NRRL B-24224 |   | 39,184 | 64.4% | 57 | 0 | MK814762 | Nguyen Quach <i>et al.</i> 2019 |
| Golden        | EA4 | <i>M. foliorum</i><br>NRRL B-24224 |   | 39,640 | 64.1% | 58 | 0 | MG925343 | Jacobs-Sera <i>et al.</i> 2020  |
| Kauala        | EA4 | <i>M. foliorum</i><br>NRRL B-24224 |   | 39,378 | 64.4% | 56 | 0 | MT657344 | Lin <i>et al.</i> 2020          |
| Koji          | EA4 | <i>M. foliorum</i><br>NRRL B-24224 |   | 39,403 | 64.2% | 56 | 0 | MG925345 | Jacobs-Sera <i>et al.</i> 2020  |
| Lucky3        | EA4 | <i>M. foliorum</i><br>NRRL B-24224 |   | 39,640 | 64.1% | 58 | 0 | MG925347 | Jacobs-Sera <i>et al.</i> 2020  |
| Pherbot       | EA4 | <i>M. foliorum</i><br>NRRL B-24224 |   | 39,171 | 64.4% | 57 | 0 | MK620904 | Nguyen Quach <i>et al.</i> 2019 |

|               |      |                                       |        |       |    |   |          |                                    |
|---------------|------|---------------------------------------|--------|-------|----|---|----------|------------------------------------|
| PrincePhergus | EA4  | <i>M. foliorum</i><br>NRRL B-24224    | 39,191 | 64.6% | 57 | 0 | MK620901 | Nguyen Quach <i>et al.</i> 2019    |
| Sinatra       | EA4  | <i>M. foliorum</i><br>NRRL B-24224    | 39,183 | 64.4% | 58 | 0 | MK937602 | Jacobs-Sera <i>et al.</i> 2020     |
| Alakazam      | EA5  | <i>M. foliorum</i><br>NRRL B-24224    | 41,269 | 64.4% | 60 | 0 | MT024862 | unpublished                        |
| Hasitha       | EA5  | <i>M. foliorum</i><br>NRRL B-24224    | 39,952 | 63.6% | 62 | 0 | MZ622182 | unpublished                        |
| Nebulous      | EA5  | <i>M. liquefaciens</i><br>LMG 16120   | 41,419 | 64.3% | 57 | 0 | MT451984 | Frost <i>et al.</i> 2021           |
| Neferthena    | EA5  | <i>M. foliorum</i><br>NRRL B-24224    | 41,706 | 64.4% | 63 | 0 | MH697589 | Jacobs-Sera <i>et al.</i> 2020     |
| QuadZero      | EA5  | <i>M. foliorum</i><br>NRRL B-24224    | 40,140 | 63.6% | 62 | 0 | MZ150787 | Cook-Easterwood <i>et al.</i> 2022 |
| Zayuliv       | EA5  | <i>M. foliorum</i><br>NRRL B-24224    | 40,457 | 63.9% | 62 | 0 | MT889377 | unpublished                        |
| Zepp          | EA5  | <i>M. foliorum</i><br>NRRL B-24224    | 40,189 | 63.6% | 62 | 0 | MN908686 | unpublished                        |
| Chepli        | EA6  | <i>M. foliorum</i><br>NRRL B-24224    | 40,332 | 63.0% | 64 | 0 | MK875794 | Jacobs-Sera <i>et al.</i> 2020     |
| Juicer        | EA6  | <i>M. foliorum</i><br>NRRL B-24224    | 41,099 | 62.8% | 63 | 0 | MZ622175 | unpublished                        |
| KatChan       | EA6  | <i>M. foliorum</i><br>NRRL B-24224    | 40,349 | 63.0% | 63 | 0 | MZ820084 | unpublished                        |
| WilliamStrong | EA6  | <i>M. paraoxydans</i><br>NRRL B-14843 | 40,613 | 63.7% | 63 | 0 | MZ355727 | unpublished                        |
| Theresita     | EA7  | <i>M. natoriense</i><br>ATCC BAA-1032 | 40,234 | 65.9% | 57 | 0 | MK660713 | Jacobs-Sera <i>et al.</i> 2020     |
| Schubert      | EA8  | <i>M. foliorum</i><br>NRRL B-24224    | 38,820 | 61.4% | 56 | 0 | MK308637 | Jacobs-Sera <i>et al.</i> 2020     |
| ChickenKing   | EA9  | <i>M. foliorum</i><br>NRRL B-24224    | 39,924 | 63.4% | 57 | 0 | MN310543 | unpublished                        |
| GaeCeo        | EA9  | <i>M. foliorum</i><br>NRRL B-24224    | 40,168 | 63.4% | 60 | 0 | MT657343 | unpublished                        |
| Mandalorian   | EA10 | <i>M. foliorum</i><br>NRRL B-24224    | 40,407 | 63.8% | 63 | 0 | MZ005670 | unpublished                        |
| Nucci         | EA10 | <i>M. foliorum</i><br>NRRL B-24224    | 40,373 | 63.7% | 63 | 0 | MN096367 | Kim <i>et al.</i> 2022             |
| YuuY          | EA10 | <i>M. foliorum</i><br>NRRL B-24224    | 40,996 | 63.2% | 64 | 2 | MN284901 | Kim <i>et al.</i> 2022             |
| Ixel          | EA11 | <i>M. liquefaciens</i><br>LMG 16120   | 40,556 | 63.3% | 61 | 0 | MT451983 | Frost <i>et al.</i> 2021           |

<sup>1</sup> NJ-tree group = sub-cluster EA1 groupings according to the neighbor-joining (NJ) tree in Figure 1

**Supplementary Table S2. *Microbacteria* hosts included in the comparative analyses.**

| host                   | # genes | length (kb) | GC-content | accession #   | reference                        |
|------------------------|---------|-------------|------------|---------------|----------------------------------|
| <i>M. amylolyticum</i> | 2,504   | 2,543       | 64.6%      | NZ_CP049253.1 | Anand <i>et al.</i> 2012         |
| <i>M. aurum</i>        | 3,343   | 3,425       | 69.9%      | NZ_CP018762.1 | Yokota <i>et al.</i> 1993        |
| <i>M. chengjingii</i>  | 3,495   | 3,623       | 61.9%      | NZ_CP061169.1 | Zhou <i>et al.</i> 2021          |
| <i>M. endophyticum</i> | 2,756   | 2,916       | 61.8%      | NZ_CP049255.1 | Alves <i>et al.</i> 2014         |
| <i>M. fandaimingii</i> | 3,506   | 3,622       | 63.3%      | NZ_CP061170.1 | Zhou <i>et al.</i> 2021          |
| <i>M. foliorum</i>     | 3,379   | 3,568       | 68.7%      | NZ_CP031425.1 | Russell <i>et al.</i> 2019       |
| <i>M. liquefaciens</i> | 3,651   | 3,712       | 68.3%      | NZ_CP101471.1 | Gómez-Ramírez <i>et al.</i> 2015 |
| <i>M. lushaniae</i>    | 3,550   | 3,650       | 70.7%      | NZ_CP044232.1 | Tian <i>et al.</i> 2021          |
| <i>M. luteum</i>       | 3,418   | 3,520       | 69.2%      | NZ_CP063814.1 | Xie <i>et al.</i> 2021           |
| <i>M. oleivorans</i>   | 2,907   | 2,997       | 69.0%      | CP031421.1    | Ortet <i>et al.</i> 2017         |
| <i>M. paraoxydans</i>  | 3,565   | 3,415       | 69.9%      | NZ_CP064873.1 | Laffineur <i>et al.</i> 2003     |
| <i>M. protaetiae</i>   | 3,555   | 3,790       | 68.0%      | NZ_CP035494.1 | Heo <i>et al.</i> 2020           |
| <i>M. resistens</i>    | 3,802   | 4,011       | 71.3%      | NZ_CP082781.1 | Behrendt <i>et al.</i> 2001      |
| <i>M. wangchenii</i>   | 3,743   | 3,828       | 70.6%      | NZ_CP038266.1 | Dong <i>et al.</i> 2019          |

**Supplementary Table S3. Matrix of ANI values of representative cluster EA bacteriophages used in the dot plot analysis (Supplementary Figure S1).**

|                       | McGalleon<br>(EA1.1) | Hamlet<br>(EA1.2) | Sjay<br>(EA1.3) | StingRay<br>(EA1) | Papafritta<br>(EA1.4) | Oats<br>(EA1.5) | Baines<br>(EA1) | Nattles<br>(EA1) | SonOfLevi<br>(EA1.6) | Gelo<br>(EA1) | Erla<br>(EA1.7) |
|-----------------------|----------------------|-------------------|-----------------|-------------------|-----------------------|-----------------|-----------------|------------------|----------------------|---------------|-----------------|
| McGalleon<br>(EA1.1)  | 1.0000               | 0.8108            | 0.8092          | 0.8096            | 0.8094                | 0.8092          | 0.8094          | 0.8088           | 0.8086               | 0.8093        | 0.8088          |
| Hamlet<br>(EA1.2)     | 0.8108               | 1.0000            | 0.8240          | 0.8249            | 0.8236                | 0.8260          | 0.8286          | 0.8282           | 0.8281               | 0.8276        | 0.8280          |
| Sjay<br>(EA1.3)       | 0.8092               | 0.8240            | 1.0000          | 0.9672            | 0.9607                | 0.9640          | 0.9579          | 0.9538           | 0.9535               | 0.9546        | 0.9544          |
| StingRay<br>(EA1)     | 0.8096               | 0.8249            | 0.9672          | 1.0000            | 0.9879                | 0.9809          | 0.9681          | 0.9637           | 0.9626               | 0.9633        | 0.9634          |
| Papafritta<br>(EA1.4) | 0.8094               | 0.8236            | 0.9607          | 0.9879            | 1.0000                | 0.9753          | 0.9617          | 0.9573           | 0.9566               | 0.9564        | 0.9566          |
| Oats<br>(EA1.5)       | 0.8092               | 0.8260            | 0.9640          | 0.9809            | 0.9753                | 1.0000          | 0.9650          | 0.9654           | 0.9620               | 0.9636        | 0.9636          |
| Baines<br>(EA1)       | 0.8094               | 0.8286            | 0.9579          | 0.9681            | 0.9617                | 0.9650          | 1.0000          | 0.9875           | 0.9850               | 0.9871        | 0.9867          |
| Nattles<br>(EA1)      | 0.8088               | 0.8282            | 0.9538          | 0.9637            | 0.9573                | 0.9654          | 0.9875          | 1.0000           | 0.9922               | 0.9941        | 0.9938          |
| SonOfLevi<br>(EA1.6)  | 0.8086               | 0.8281            | 0.9535          | 0.9626            | 0.9566                | 0.9620          | 0.9850          | 0.9922           | 1.0000               | 0.9942        | 0.9943          |
| Gelo<br>(EA1)         | 0.8093               | 0.8276            | 0.9546          | 0.9633            | 0.9564                | 0.9636          | 0.9871          | 0.9941           | 0.9942               | 1.0000        | 0.9962          |
| Erla<br>(EA1.7)       | 0.8088               | 0.8280            | 0.9544          | 0.9634            | 0.9566                | 0.9636          | 0.9867          | 0.9938           | 0.9943               | 0.9962        | 1.0000          |
| Finny<br>(EA2)        | 0.7058               | 0.7003            | 0.7084          | 0.7093            | 0.7085                | 0.7094          | 0.7095          | 0.7101           | 0.7096               | 0.7097        | 0.7100          |
| Pajaza<br>(EA3)       | 0.6861               | 0.6806            | 0.6829          | 0.6879            | 0.6859                | 0.6846          | 0.6864          | 0.6880           | 0.6868               | 0.6877        | 0.6879          |
| Koji<br>(EA4)         | 0.7097               | 0.7099            | 0.7144          | 0.7147            | 0.7154                | 0.7135          | 0.7136          | 0.7144           | 0.7152               | 0.7150        | 0.7151          |
| QuadZero<br>(EA5)     | 0.6743               | 0.6812            | 0.6806          | 0.6832            | 0.6787                | 0.6842          | 0.6832          | 0.6824           | 0.6815               | 0.6821        | 0.6825          |
| Juicer<br>(EA6)       | 0.6911               | 0.6893            | 0.6833          | 0.6854            | 0.6826                | 0.6834          | 0.6817          | 0.6821           | 0.6813               | 0.6809        | 0.6817          |
| Theresita<br>(EA7)    | 0.6748               | 0.6762            | 0.6683          | 0.6799            | 0.6736                | 0.6750          | 0.6731          | 0.6756           | 0.6756               | 0.6786        | 0.6738          |
| Schubert<br>(EA8)     | 0.7027               | 0.7020            | 0.7054          | 0.7067            | 0.7053                | 0.7055          | 0.7061          | 0.7079           | 0.7081               | 0.7058        | 0.7060          |



|                 |        |        |        |        |        |        |        |        |        |        |        |
|-----------------|--------|--------|--------|--------|--------|--------|--------|--------|--------|--------|--------|
| GaeCeo<br>(EA9) | 0.7234 | 0.7210 | 0.7266 | 0.7272 | 0.7256 | 0.7259 | 0.7271 | 0.7253 | 0.7256 | 0.7262 | 0.7258 |
| Nucci<br>(EA10) | 0.7057 | 0.7042 | 0.7103 | 0.7122 | 0.7115 | 0.7121 | 0.7129 | 0.7123 | 0.7119 | 0.7123 | 0.7125 |
| Ixel<br>(EA11)  | 0.6930 | 0.6898 | 0.6936 | 0.6963 | 0.6960 | 0.6967 | 0.6949 | 0.6941 | 0.6939 | 0.6937 | 0.6939 |

**Supplementary Table S3 cont.**

|                       | Finny<br>(EA2) | Pajaza<br>(EA3) | Koji<br>(EA4) | QuadZero<br>(EA5) | Juicer<br>(EA6) | Theresita<br>(EA7) | Schubert<br>(EA8) | GaeCeo<br>(EA9) | Nucci<br>(EA10) | Ixel<br>(EA11) |
|-----------------------|----------------|-----------------|---------------|-------------------|-----------------|--------------------|-------------------|-----------------|-----------------|----------------|
| McGalleon<br>(EA1.1)  | 0.7058         | 0.6861          | 0.7097        | 0.6743            | 0.6911          | 0.6748             | 0.7027            | 0.7234          | 0.7057          | 0.6930         |
| Hamlet<br>(EA1.2)     | 0.7003         | 0.6806          | 0.7099        | 0.6812            | 0.6893          | 0.6762             | 0.7020            | 0.7210          | 0.7042          | 0.6898         |
| Sjay<br>(EA1.3)       | 0.7084         | 0.6829          | 0.7144        | 0.6806            | 0.6833          | 0.6683             | 0.7054            | 0.7266          | 0.7103          | 0.6936         |
| StingRay<br>(EA1)     | 0.7093         | 0.6879          | 0.7147        | 0.6832            | 0.6854          | 0.6799             | 0.7067            | 0.7272          | 0.7122          | 0.6963         |
| Papafritta<br>(EA1.4) | 0.7085         | 0.6859          | 0.7154        | 0.6787            | 0.6826          | 0.6736             | 0.7053            | 0.7256          | 0.7115          | 0.6960         |
| Oats<br>(EA1.5)       | 0.7094         | 0.6846          | 0.7135        | 0.6842            | 0.6834          | 0.6750             | 0.7055            | 0.7259          | 0.7121          | 0.6967         |
| Baines<br>(EA1)       | 0.7095         | 0.6864          | 0.7136        | 0.6832            | 0.6817          | 0.6731             | 0.7061            | 0.7271          | 0.7129          | 0.6949         |
| Nattles<br>(EA1)      | 0.7101         | 0.6880          | 0.7144        | 0.6824            | 0.6821          | 0.6756             | 0.7079            | 0.7253          | 0.7123          | 0.6941         |
| SonOfLevi<br>(EA1.6)  | 0.7096         | 0.6868          | 0.7152        | 0.6815            | 0.6813          | 0.6756             | 0.7081            | 0.7256          | 0.7119          | 0.6939         |
| Gelo<br>(EA1)         | 0.7097         | 0.6877          | 0.7150        | 0.6821            | 0.6809          | 0.6786             | 0.7058            | 0.7262          | 0.7123          | 0.6937         |
| Erla<br>(EA1.7)       | 0.7100         | 0.6879          | 0.7151        | 0.6825            | 0.6817          | 0.6738             | 0.7060            | 0.7258          | 0.7125          | 0.6939         |
| Finny<br>(EA2)        | 1.0000         | 0.6999          | 0.7259        | 0.6924            | 0.7079          | 0.6927             | 0.7137            | 0.7264          | 0.7605          | 0.7118         |
| Pajaza<br>(EA3)       | 0.6999         | 1.0000          | 0.7096        | 0.6662            | 0.6895          | 0.6669             | 0.7213            | 0.7010          | 0.7001          | 0.6738         |
| Koji<br>(EA4)         | 0.7259         | 0.7096          | 1.0000        | 0.6961            | 0.6992          | 0.7107             | 0.7221            | 0.7540          | 0.7374          | 0.6934         |
| QuadZero<br>(EA5)     | 0.6924         | 0.6662          | 0.6961        | 1.0000            | 0.7029          | 0.6478             | 0.6809            | 0.6866          | 0.7129          | 0.7084         |
| Juicer<br>(EA6)       | 0.7079         | 0.6895          | 0.6992        | 0.7029            | 1.0000          | 0.6390             | 0.6914            | 0.6991          | 0.7087          | 0.7124         |
| Theresita<br>(EA7)    | 0.6927         | 0.6669          | 0.7107        | 0.6478            | 0.6390          | 1.0000             | 0.6854            | 0.6998          | 0.7001          | 0.6375         |
| Schubert<br>(EA8)     | 0.7137         | 0.7213          | 0.7221        | 0.6809            | 0.6914          | 0.6854             | 1.0000            | 0.7275          | 0.7128          | 0.6982         |

|                 |        |        |        |        |        |        |        |        |        |        |
|-----------------|--------|--------|--------|--------|--------|--------|--------|--------|--------|--------|
| GaeCeo<br>(EA9) | 0.7264 | 0.7010 | 0.7540 | 0.6866 | 0.6991 | 0.6998 | 0.7275 | 1.0000 | 0.7163 | 0.7018 |
| Nucci<br>(EA10) | 0.7605 | 0.7001 | 0.7374 | 0.7129 | 0.7087 | 0.7001 | 0.7128 | 0.7163 | 1.0000 | 0.7117 |
| Ixel<br>(EA11)  | 0.7118 | 0.6738 | 0.6934 | 0.7084 | 0.7124 | 0.6375 | 0.6982 | 0.7018 | 0.7117 | 1.0000 |

**Supplementary Table S4. Exploratory host range prediction.** Putative host genera of the 125 cluster EA bacteriophages included in this study as predicted by PHERI (Baláž et al., 2020).

[illegible]

|               |     |   |
|---------------|-----|---|
| Convict       | EA1 | ✓ |
| Dave          | EA1 | ✓ |
| Den3          | EA1 | ✓ |
| Dothraki      | EA1 | ✓ |
| Erla          | EA1 | ✓ |
| Espinosa      | EA1 | ✓ |
| Etna          | EA1 | ✓ |
| Etta          | EA1 | ✓ |
| Gargoyle      | EA1 | ✓ |
| Gelo          | EA1 | ✓ |
| Gershwin      | EA1 | ✓ |
| Greys         | EA1 | ✓ |
| Gubbabump     | EA1 | ✓ |
| Hamlet        | EA1 | ✓ |
| HanSolo       | EA1 | ✓ |
| Ilzat         | EA1 | ✓ |
| Ioannes       | EA1 | ✓ |
| Jenos         | EA1 | ✓ |
| Kale          | EA1 | ✓ |
| Klimt         | EA1 | ✓ |
| Knox          | EA1 | ✓ |
| Kurt1         | EA1 | ✓ |
| Leafus        | EA1 | ✓ |
| Lovelyunicorn | EA1 | ✓ |
| Ludgate       | EA1 | ✓ |

|             |     |   |
|-------------|-----|---|
| MaeLinda    | EA1 | ✓ |
| ManRay      | EA1 | ✓ |
| Martin      | EA1 | ✓ |
| McGalleon   | EA1 | ✓ |
| MillyPhilly | EA1 | ✓ |
| MonChoix    | EA1 | ✓ |
| Nagem       | EA1 | ✓ |
| Nattles     | EA1 | ✓ |
| Oats        | EA1 | ✓ |
| Oxtober96   | EA1 | ✓ |
| Papafritta  | EA1 | ✓ |
| ParleG      | EA1 | ✓ |
| Peep        | EA1 | ✓ |
| Peppino     | EA1 | ✓ |
| Pherferi    | EA1 | ✓ |
| Phriends    | EA1 | ✓ |
| Pocket      | EA1 | ✓ |
| PuppyEggo   | EA1 | ✓ |
| Raccoon     | EA1 | ✓ |
| Raptor      | EA1 | ✓ |
| Redfield    | EA1 | ✓ |
| Renzie      | EA1 | ✓ |
| Riyhil      | EA1 | ✓ |
| Robinson    | EA1 | ✓ |
| Schnapsidee | EA1 | ✓ |

|               |     |   |   |
|---------------|-----|---|---|
| Sedgewig      | EA1 | ✓ |   |
| Shee          | EA1 | ✓ |   |
| SJay          | EA1 | ✓ |   |
| SonOfLevi     | EA1 | ✓ |   |
| Stanktossa    | EA1 | ✓ |   |
| StingRay      | EA1 | ✓ |   |
| Stormbreaker8 | EA1 | ✓ |   |
| Strathdee     | EA1 | ✓ |   |
| Superfresh    | EA1 | ✓ |   |
| TatarkaPM     | EA1 | ✓ |   |
| Teagan        | EA1 | ✓ |   |
| TeddyBear     | EA1 | ✓ |   |
| Tenda         | EA1 | ✓ |   |
| Thorongil     | EA1 | ✓ |   |
| TinSulphur    | EA1 | ✓ |   |
| Velene        | EA1 | ✓ |   |
| WildNOut      | EA1 | ✓ |   |
| Winzigespinne | EA1 | ✓ |   |
| Zada          | EA1 | ✓ |   |
| Andromedas    | EA2 |   |   |
| ColaCorta     | EA2 |   |   |
| Eleri         | EA2 |   |   |
| Finny         | EA2 | ✓ | ✓ |
| Glamour       | EA2 |   |   |
| MCubed        | EA2 |   |   |

[illegible]



[illegible]

## REFERENCES

- Alves, A.; Correia, A.; Igual, J.M.; Trujillo, M.E. *Microbacterium endophyticum* sp. nov. and *Microbacterium halimionae* sp. nov., endophytes isolated from the salt-marsh plant *Halimione portulacoides* and emended description of the genus *Microbacterium*. *Sys. Appl. Microbiol.* **2014**, *37*, 474–479.
- Anand, S.; Bala, K.; Saxena, A.; Schumann, P.; Lal, R. *Microbacterium amylolyticum* sp. nov., isolated from soil from an industrial waste site. *Int. J. Syst. Evol. Microbiol.* **2012**, *62*, 2114–2120.
- Baláz, A.; Kajsík, M.; Budiš, J.; Szemeš, T.; Turňa, J. PHERI—Phage Host Exploration Pipeline. bioRxiv 2020. Available online: <https://www.biorxiv.org/content/10.1101/2020.05.13.093773v3> (accessed on 20 December 2022)
- Behrendt, U.; Ulrich, A.; Schumann, P. Description of *Microbacterium foliorum* sp. nov. and *Microbacterium phyllosphaerae* sp. nov., isolated from the phyllosphere of grasses and the surface litter after mulching the sward, and reclassification of *Aureobacterium resistens* (Funke et al. 1998) as *Microbacterium resistens* comb. nov. *Int. J. Syst. Evol. Microbiol.* **2001**, *51*, 1267–1276.
- Cook-Easterwood, J.; Bethel, D.J.; Kurikose, I.; Katsanos, J. The genomic characterization of two *Microbacterium foliorum*-specific bacteriophages, QuadZero and AnnaLie. *Microbiol. Resour. Announc.* **2022**, *11*, e00208-22.
- Dong, K.; Yang, J.; Lu, S.; Pu, J.; Lai, X.-H.; Jin, D.; Li, J.; Zhang, G.; Wang, X.; Zhang, S.; et al. *Microbacterium wangchenii* sp. nov., isolated from faeces of Tibetan gazelles (*Procapra picticaudata*) on the Qinghai-Tibet plateau. *Int. J. Syst. Evol. Microbiol.* **2019**, *70*, 1307–1314.
- El Yaman, R.; Anderson, J.S.; Anderson, T.M.; Avalos, M.A.; Bangurah, S.K.; Dada, K.B.; Degener, K.R.; Hadeed, M.N.; Issa, L.H.; Jaeran, A.S.; et al. Genome sequences of microbacteriophages Zada and Ioannes. *Microbiol. Resour. Announc.* **2020**, *9*, e01012-20.
- Frost, V.J.; Westover, K.M. Complete genome sequences of *Microbacterium liquefaciens* phages Mercedes, Leafus, Nebulous, and Ixel. *Microbiol. Resour. Announc.* **2021**, *10*, e00068-21.
- Gómez-Ramírez, M.; Montero-Álvarez, L.A.; Tobón-Avilés, A.; Fierros-Romero, G.; Rojas-Avelizapa, N.G. *Microbacterium oxydans* and *Microbacterium liquefaciens*: A biological alternative for the treatment of Ni-V-containing wastes. *J. Environ. Sci. Health A Tox. Hazard Subst. Environ. Eng.* **2015**, *50*, 602–610.
- Heo, J.; Cho, H.; Kim, M.A.; Hamada, M.; Tamura, T.; Saitou, S.; Kim, S.-J.K.; Kwon, S.-W. 2020 *Microbacterium protaetiae* sp. nov. isolated from gut of larva of *Protaetia brevitarsis seulensis*. *Int. J. Syst. Evol. Microbiol.* **2020**, *70*, 2226–2232.
- Jacobs-Sera, D.; Abad, L.A.; Alvey, R.M.; Anders, K.R.; Aull, H.G.; Bhalla, S.S.; Blumer, L.S.; Bollivar, D.W.; Bonilla, J.A.; Butela, K.A.; et al. Genomic diversity of bacteriophages infecting *Microbacterium* spp. *PLoS One* **2020**, *15*, e0234636.
- Kim, U.; Paul, E.S.; Diaz, A. Characterization of phages YuuY, KaiHaiDragon, and OneinaGillian isolated from *Microbacterium foliorum*. *Int. J. Mol. Sci.* **2022**, *23*, 6609.
- Laffineur, K.; Avesani, V.; Cornu, G.; Charlier, J.; Janssens, M.; Wauters, G.; Delmée, M. Bacteremia due to a novel *Microbacterium* species in a patient with leukemia and description of *Microbacterium paraoxydans* sp. nov. *J. Clin. Microbiol.* **2003**, *41*, 2242–2246.
- Lee, T.; Aguirre, M.; Andrews, S.; Bahr, K.; Ballard, A.; Bristerpostma, M.; Cox, F.; Dowell, L.; Kiker, D.; Lujan, T.; et al. Complete genome sequence of bacteriophage Finny, isolated from a *Microbacterium foliorum* culture. *Microbiol. Resour. Announc.* **2019**, *8*, e01039-19.
- Lin, H.; Reeves, M.; Acevedo, M.; Bass, K.; Chau, E.; Ching, B.; Enriquez, E.; Evans, S.; Mamora, K.; Pang, C.; et al. Genome sequences of bacteriophages ClearAsMud and Kauala, isolated from *Microbacterium foliorum*. *Microbiol. Resour. Announc.* **2020**, *9*, e01026-20.
- Milhaven, M.; Cai, L.; Cherian, S.; Johnson, K.; Salas Perez, K.; Blanco, M.; Garg, A.; Lobatos, J.; Mitra, C.; Strasser, M.; Harms, R.; Pfeifer, S.P. Complete genome sequence of the *Microbacterium* bacteriophage Chako. *Microbiol. Resour. Announc.*, in review.
- Milhaven, M.; Hastings, E.; Brister, D.; Cevallos, L.; Chilukuri, S.; Diyya, A.; Garg, A.; Hernandez, R.; Kelly, D.; Lazo, K.; et al. Complete genome sequence of *Microbacterium* bacteriophage Erla. *Microbiol. Resour. Announc.* **2021**, *10*, e01354-20.
- Nguyen Quach, A.M.; Varghese, A.E.; Siddiq, K.; Pappano, I.G.; Thaha, A.; Marcelis, T.A.; Feruku, B.; Vindyala, A.; Mohamed, R.; Johnson, K.A.; et al. Complete genome sequences of seven EA cluster microbacteriophages, Bustleton, MillyPhilly, Riyhil, Phriends, Pherbot, PrincePhergus, and TinSulphur. *Microbiol. Resour. Announc.* **2019**, *8*, e01193-19.
- Ortet, P.; Gallois, N.; Piette, L.; Long, J.; Berthomieu, C.; Armengaud, J.; Barakat, M.; Chapon, V. Draft genome sequence of *Microbacterium oleivorans* strain A9, a bacterium isolated from Chernobyl radionuclide-contaminated soil. *Genome Announc.* **2017**, *5*, e00092-17.

Russell, D.A.; Garlena, R.A.; Hatfull, G.F. Complete genome sequence of *Microbacterium foliorum* NRRL B-24224, a host for bacteriophage discovery. *Microbiol. Resour. Announc.* **2019**, *8*, e01467-18.

Tian, Z.; Yang, J.; Lai, X.-H.; Pu, J.; Jin, D.; Luo, X.; Huang, Y.; Li, J.; Zhang, G.; Wang, S.; et al. *Microbacterium caowuchunii* sp. nov. and *Microbacterium lushaniae* sp. nov., isolated from Plateau Pika (*Ochotona Curzoniae*) on the Qinghai–Tibet plateau of PR China. *Int. J. Syst. Evol. Microbiol.* **2021**, *71*, 004662.

Xie, F.; Niu, S.; Lin, X.; Pei, S.; Jiang, L.; Tian, Y.; Zhang, G. Description of *Microbacterium luteum* sp. nov., *Microbacterium cremeum* sp. nov., and *Microbacterium atlanticum* sp. nov., three novel C50 carotenoid producing bacteria. *J. Microbiol.* **2021**, *59*, 886–897.

Yokota, A.; Takeuchi, M.; Weiss, N. Proposal of two new species in the genus *Microbacterium*: *Microbacterium dextranolyticum* sp. nov. and *Microbacterium Aurum* sp. nov. *Int. J. Syst. Evol. Microbiol.* **1993**, *43*, 549–554.

Zhou, J.; Huang, Y.; Yang, J.; Lai, X.-H.; Jin, D.; Lu, S.; Pu, J.; Zhang, S.; Zhu, W.; Xu, M.; et al. *Microbacterium chengjingii* sp. nov. and *Microbacterium fandaimingii* sp. nov., isolated from bat faeces of *Hipposideros* and *Rousettus* species. *Int. J. Syst. Evol. Microbiol.* **2021**, *71*, 004858.
